1 *C. difficile*-associated antibiotics prime the  
2 host for infection by a microbiome-  
3 independent mechanism.

4 Jemila C. Kester, Douglas K. Brubaker, Jason Velazquez, Charles Wright, Douglas A.  
5 Lauffenburger, and Linda G. Griffith\*

6 Department of Biological Engineering  
7 Massachusetts Institute of Technology

8 77 Massachusetts Avenue, Cambridge, MA, 02139

9

10 \*corresponding author: [griff@mit.edu](mailto:griff@mit.edu)

11

## 12 Abstract

13 The most clinically relevant risk factor for *Clostridioides difficile*-associated disease (CDAD) is  
14 recent antibiotic treatment. Though most broad-spectrum antibiotics significantly disrupt the  
15 structure of the gut microbiota, only particular ones increase CDAD risk, suggesting additional  
16 factors might increase the risk from certain antibiotics. Here we show that commensal-independent  
17 effects of antibiotics collectively prime an *in vitro* germ-free human gut for CDAD. We found a  
18 marked loss of mucosal barrier and immune function with CDAD-associated antibiotic  
19 pretreatment distinct from pretreatment with an antibiotic unassociated with CDAD, which did not  
20 reduce innate immune or mucosal barrier functions. Importantly, pretreatment with CDAD-  
21 associated antibiotics sensitized mucosal barriers to *C. difficile* toxin activity in primary cell-  
22 derived enteroid monolayers. These data implicate commensal-independent host changes in the  
23 increased risk of CDAD with specific antibiotics. Our findings are contrary to the previously held  
24 belief that antibiotics allow for CDAD solely through disruption of the microbiome. We anticipate  
25 this work to suggest potential avenues of research for host-directed treatment and preventive  
26 therapies for CDAD, and to impact human tissue culturing protocols.

27

## 28 Introduction

29 *Clostridioides difficile*-associated disease (CDAD) is a CDC urgent public health threat<sup>1</sup>, with  
30 453,000 incident cases in the U.S. in 2011<sup>2</sup>. CDAD is estimated to account for more than 44,500  
31 deaths and over \$5 billion in related healthcare costs in the United States each year<sup>3</sup>. CDAD  
32 treatment failure is increasing due to rising levels of antibiotic resistant and hypervirulent strains  
33 of *C. difficile* (reviewed in <sup>4</sup>) and high rates of persistent and recurrent infections (reviewed in <sup>5</sup>).  
34 New treatment and prevention strategies are needed. A promising strategy is host directed therapy<sup>6</sup>;  
35 yet, this requires a better understanding of how a person becomes susceptible to CDAD.

36 CDAD pathogenesis requires the outgrowth of the etiologic agent, *Clostridioides difficile* (*C.*  
37 *difficile*), in the gastrointestinal tract. While a functional gut microbiome is able to prevent the  
38 outgrowth of *C. difficile*<sup>7</sup>, in large part due to bacterial-dependent production of secondary bile  
39 acids<sup>8,9</sup>, loss of a functional gut microbiome allows for outgrowth of the colony. Once quorum is  
40 reached, the bacteria begin secreting toxins<sup>8</sup>, specifically TcdB, which is primarily responsible for  
41 the disease's symptoms and pathogenesis<sup>9</sup>.

42 The most clinically relevant risk factor for CDAD is recent antibiotic treatment<sup>10</sup>. While there  
43 is substantial evidence supporting a causal link between microbiome disruption by antibiotics and  
44 CDAD (reviewed in <sup>11</sup>), the hypothesis that recent antibiotic treatment is the sole causal mechanism  
45 for CDAD explains neither the rising rates of CDAD— independent of recent antibiotic  
46 treatment<sup>12</sup>—nor the observation that nearly half of all community acquired cases present without  
47 prior antibiotic exposure<sup>13</sup>. Furthermore, antibiotic treatment alone produces fewer and less  
48 consistent differences in microbial community structure than are observed clinically between  
49 patients with and without CDAD<sup>14</sup>. Notwithstanding the frequency of proteobacteria blooms  
50 following antibiotic exposure<sup>15</sup>, no shared taxonomic change has been identified in successful fecal  
51 microbial transplant donors<sup>16</sup> or recipients<sup>17</sup>, and alterations to bacterial load do not correlate with

52 risk of CDAD<sup>18</sup>. Taken together, these data suggest a previously overlooked commensal-  
53 independent host contribution to antibiotic-associated risk of CDAD.

54 Recent work has shown that host-acting drugs have a significant effect on bacteria<sup>19</sup>. The  
55 inverse has also been shown: a commonly prescribed antibiotic cocktail alters the mitochondrial  
56 function of enterocytes in germ-free mice<sup>20</sup>, demonstrating the commensal-independent effect of  
57 anti-bacterials on the host in this rodent model. Yet, the effects of CDAD-associated antibiotics on  
58 the host—especially the *human* host—and how these effects might contribute to CDAD is not  
59 known. Though previous studies have explored the effects of antibiotics in general on the host in  
60 a variety of animal models, isolating the effects of particular antibiotics on host-dependent  
61 mechanisms of antibiotic-associated CDAD requires a controlled study assessing these  
62 mechanisms for multiple antibiotics with varying degrees of CDAD-associated risk in the same  
63 experimental context, preferably with models that include elements of the human mucosal barrier  
64 response. It is only in this context of a multi-factorial study design that the most translationally  
65 relevant biological findings can be identified and validated in primary human donor tissues.

66

## 67 Results

### 68 CDAD-associated antibiotics induce distinct changes to host gene expression

69 To test the commensal-independent effects of antibiotics on the host, we used a transwell-based  
70 *in vitro* epithelial barrier without bacteria to model a germ-free human gut<sup>21,22</sup>. We treated mature  
71 mucosal barriers with antibiotics with CDAD odds ratios, from one (no risk) to 17 (highest risk;  
72 Supplemental Table 1) in order to achieve complete coverage of the CDAD risk landscape. We  
73 dosed from the basal side to mimic intravenous administration due to its increased risk of CDAD<sup>23</sup>,  
74 using clinically-relevant dose ranges. Tigecycline is an intravenous tetracycline derivative that  
75 does not increase the risk of CDAD<sup>24</sup>. We used clindamycin and ciprofloxacin for CDAD-  
76 associated antibiotics as they have the highest risk of CDAD<sup>24,25</sup>. Tigecycline and clindamycin  
77 share a similar mechanism of action, both targeting bacterial translation machinery. Conversely,

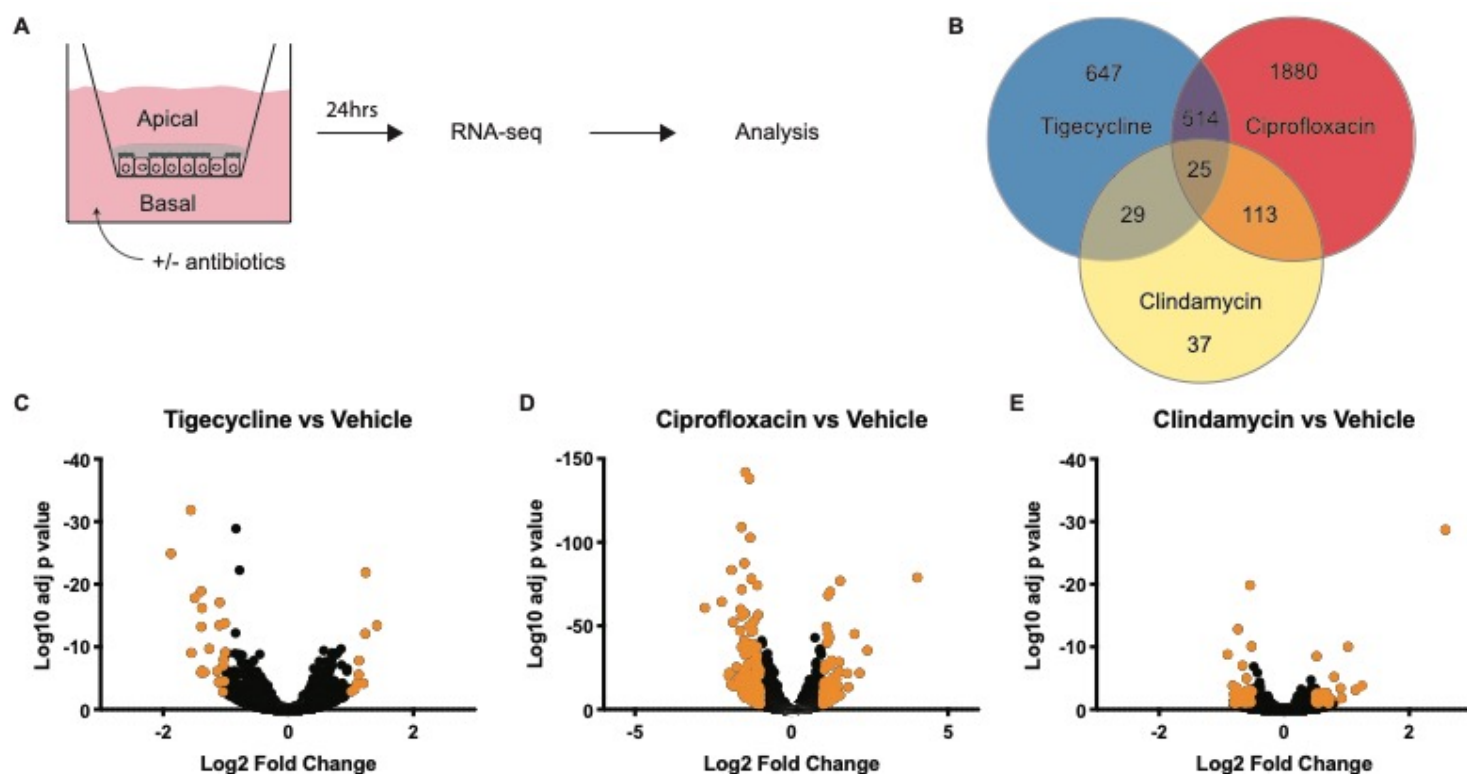

**Fig 1: RNA-seq identifies differential gene expression changes following antibiotic treatment.** A) Schematic of RNA-seq procedure. 6 transwells per condition. B) Venn diagram and color key of gene expression patterns. C-E) Volcano plots of gene expression changes for indicated antibiotic over vehicle. Highlighted points have at least a 2-fold change with an adjusted p value of <0.01.

78 ciprofloxacin inhibits bacterial DNA replication. All three are considered broad-spectrum  
79 antibiotics.

80 After 24 hours of exposure, RNA-seq identified gene expression changes under high and low  
81 treatment conditions, with the largest number of transcriptional changes being driven by  
82 ciprofloxacin treatment (Fig 1B-E). We found DMSO treatment at high concentration had  
83 significant effect on gene expression, and therefore performed subsequent analysis using the low  
84 concentrations of both DMSO and tigecycline (Supplemental Fig S1).

85 Unsupervised hierarchical clustering of the 606 genes with statistically significant gene  
86 expression changes in at least two treatment groups revealed antibiotic-specific alterations of the  
87 gut transcriptome (Supplemental Fig S2). This clustering showed varying patterns of  
88 transcriptional response to treatment: several transcripts shared similar expression configurations  
89 across experimental conditions, some had dose-dependent effects correlating to increasing or  
90 decreasing CDAD risk, still others exhibited more complex behaviors not apparent from the initial  
91 clustering. However, the ciprofloxacin-driven expression changes dominated the clustering,  
92 highlighting the need for more nuanced computational analysis.

93 In order to identify genes with transcriptional changes shared between both CDAD-associated  
94 antibiotics, we used a self-organizing map (SOM). A SOM is a neural network-based unsupervised  
95 clustering technique that groups similar observations together on the SOM neurons. Here, we used  
96 the SOM to cluster gene transcript fold changes across antibiotic treatments to identify genes with  
97 expression changes associated with CDAD risk. Similar to other dimensionality reduction  
98 techniques, such as principal components analysis (PCA), SOMs produce a low-dimensional  
99 projection of high-dimensional data that facilitates visualization of patterns. However, unlike PCA  
100 or our previous hierarchical clustering, the SOM analysis merges two important features  
101 simultaneously: (i) it incorporates information about the expected number of clusters in the data

102 by defining the number of SOM neurons based on experimental design (number of conditions);  
103 and (ii) it allows the data to drive identification of the most informative groups among those  
104 clusters (i.e., SOM neurons).

105 The architecture of the SOM employed here to map the 606 significant genes is based on  
106 increased or decreased gene expression (2 directions) in each of three (3) experimental conditions,  
107 with an extra neuron for noisy profiles ( $2^3+1=9$  neurons). Genes with similar expression patterns  
108 cluster in a node, with the number of genes per node indicated (Fig. 2A). Plotting neighbor weight  
109 distances allows for the visualization of similarities between nodes (Fig. 2B).

110 Each neuron of the SOM captured gene expression responses to antibiotic treatment that  
111 grouped according to changing CDAD risk ratios. These patterns could then be investigated by  
112 plotting line graphs of the gene fold changes across increasing CDAD risk for each node (Fig. 2C).  
113 Two nodes identified gene expression responses that were specifically elevated (Node 3) or  
114 repressed (Node 7) in response to CDAD-associated antibiotic treatment. Another two nodes (4  
115 and 6) captured risk ratio-dependent changes in gene expression responses to CDAD-associated  
116 antibiotic treatment, with genes on Node 4 being more downregulated and genes on Node 6 being  
117 more upregulated in antibiotics with higher CDAD risk ratios. Altogether, nodes 3, 4, 6, and 7  
118 capture a set of 261 genes with expression patterns common among ciprofloxacin and clindamycin  
119 that indicated a shared pattern of expression unique to the CDAD-associated antibiotics (Fig. 2C),  
120 despite different mechanisms of action between ciprofloxacin and clindamycin, and tigecycline  
121 and clindamycin being similar.

122 In order to identify the biological functions associated with CDAD-associated antibiotic  
123 treatment, we performed Gene Ontology Enrichment Analysis (GOEA) of each node (Fig. 2D,  
124 Supplemental Table 2). We would expect nodes that cluster by mechanism of action to be enriched  
125 in related GO terms. For instance, the gene expression responses common to tigecycline and

126 clindamycin (Nodes 2 and 8) were enriched for the cellular targets of those drugs, translation  
127 machinery and chromosome maintenance (Fig. 2D). It is important to note that these targets are  
128 considered bacterial cellular components, yet we found they impacted mammalian cells. This  
129 finding from the SOM clustering that grouped known target-associated gene expression responses  
130 to tigecycline and clindamycin provided an important positive control for interpreting the  
131 biological functions associated with the other SOM neurons.

132 We then analyzed the SOM clusters that captured genes with shared expression response  
133 patterns to CDAD-associated antibiotics (Nodes 3, 4, 6, and 7), and distinct from low risk, to  
134 generate mechanistic hypotheses of host-dependent mechanisms of CDAD. The GOEA functional  
135 annotations of CDAD-associated antibiotic treatment showed an accumulation of cellular toxins  
136 in the cell via retrograde secretion (Node 3: toxin transport) coupled with a decrease in secretion  
137 out of the cell (Node 7). We found that as antibiotic CDAD risk ratios increased, genes associated  
138 with immune signaling GO terms were suppressed (Node 4) and genes associated with cell-cell  
139 and cell-ECM connections were increased (Nodes 6 and 7) in a dose-dependent manner. Overall,  
140 GOEA of these SOM suggested that treatment with CDAD-associated antibiotics resulted in  
141 alterations to transport of extracellular components out of the cell, toxins into the cell, and a  
142 reduced immune capacity after only 24hrs of treatment.



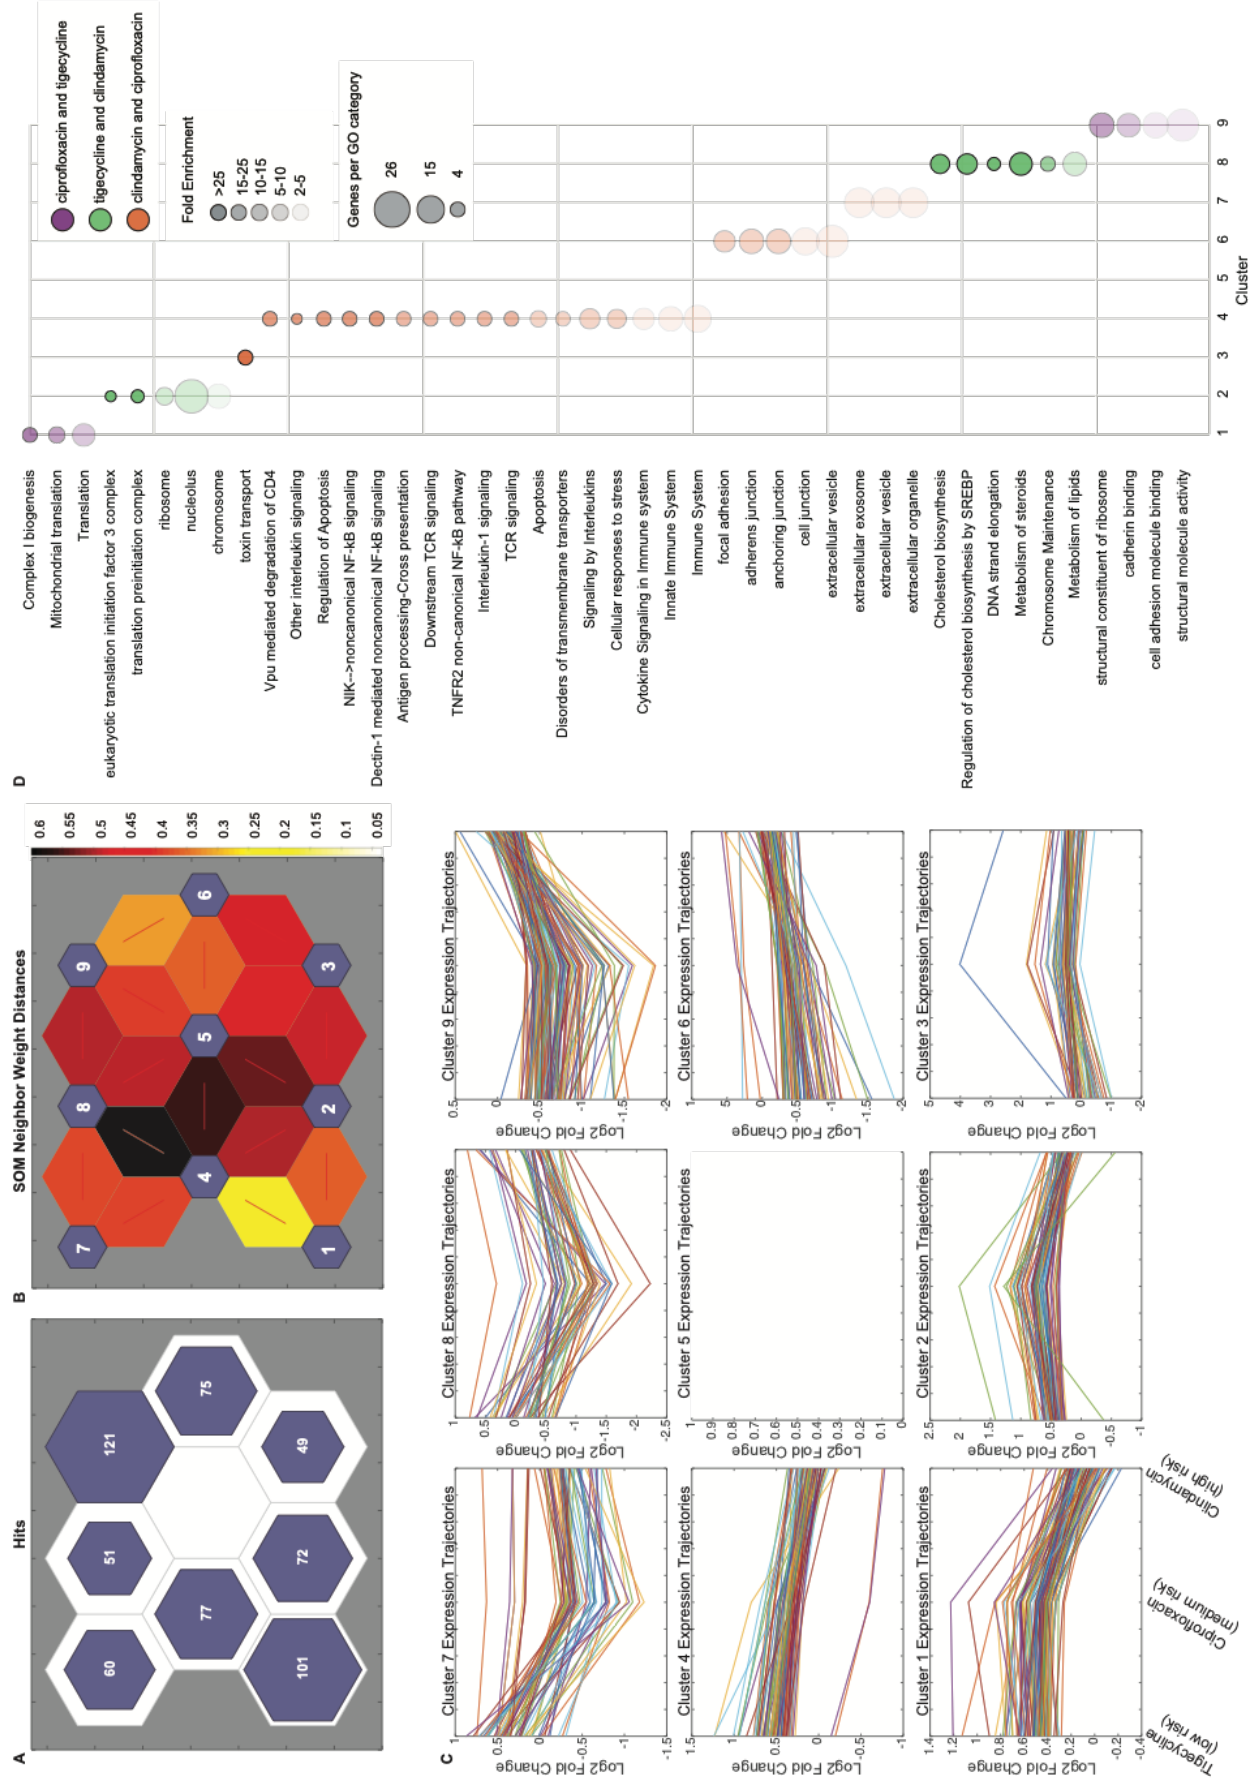

**Fig 2. Self-organizing map (SOM) predicts CDAD-associated antibiotics may alter barrier and immune functions.** A) SOM of 606 genes with statistically significant expression changes by RNAseq. B) SOM neighbor weight distances indicate level of similarity between each node pair. C) Line graphs of all genes in each node, plotted as increasing risk of CDAD on the x-axis by standardized fold change on the y-axis. D) Bubble chart showing overrepresented GO terms for clusters as indicated using PANTHER overrepresentation test, FDR <0.05.

## 144 CDAD-associated antibiotics reduce mucosal barrier and immune functions

145 Based on the results of the SOM analysis, we hypothesized that CDAD-associated antibiotic  
146 treatment would result in acute effects of impaired epithelial barrier and innate immune cell  
147 function and that these would be present after chronic exposure as with *in vivo* antibiotic treatment  
148 patterns. We tested these SOM predictions experimentally using three complementary levels of *in*  
149 *vitro* models: (i) acute effects (24 hr) on epithelial barrier function; (ii) chronic (3 days) effects on  
150 epithelial exposure to toxin; and (iii) acute effects on innate immune cell function. We assessed  
151 the barrier function of mucosal barriers following antibiotic treatment. We find increased death of  
152 cells in the monolayers with ciprofloxacin treatment, which agrees with previous work using  
153 significantly higher concentrations<sup>26</sup>, and clindamycin, which has not previously been  
154 demonstrated (Supplemental Fig S3). Despite this, none of the antibiotics used affected the  
155 physical integrity of the barrier as determined by transepithelial electrical resistance 24 hours post  
156 treatment (Supplemental Fig S4).

157 To better mimic the 3-7 day course of antibiotics in routine *in vivo* human treatment patterns,  
158 we extended the treatment period to a 3 day basal dose. We quantified both mucin gene expression  
159 and secretion as they strongly influence microbial interactions with the mucosal barrier. Total cell-  
160 bound (Fig. 3A) mucin was reduced with CDAD-associated antibiotics, while mucins in low risk  
161 CDAD treatment groups remain unchanged (Fig. 3A, B). Secreted mucins were reduced with both  
162 CDAD-associate antibiotics, though the clindamycin treatment group does not reach statistical  
163 significance (Fig 3B). This is recapitulated in primary cell-derived 2D enteroids: one of the main  
164 membrane-bound mucins in the colon<sup>27</sup>, *muc17*, is reduced with ciprofloxacin but not clindamycin  
165 or tigecycline treatment (Fig. 3C), suggesting another mucin is altered with clindamycin treatment  
166 to account for the loss of total cell-bound mucins.

167 To assess the effect of extended, low-dose antibiotic treatment on immune function, we treated  
168 an immune-competent mucosal barrier for 3 days with each antibiotic, again dosing from the basal  
169 side. IL-8 secretion is the primary chemokine implicated in CDAD<sup>28</sup>. IL-8 is required for  
170 neutrophil recruitment to contain the infection, yet neutrophils are also implicated in progression  
171 of disease<sup>29</sup>. Thus, a delicate control over dissemination and clearance of neutrophils is likely  
172 required for resolution of infection.

173 We therefore assessed the effect of antibiotics on the ability of immune-competent mucosal  
174 barriers to induce *il8* expression and IL-8 secretion following LPS stimulation. LPS signals  
175 through TLR4 and *tlr4* gene expression should increase following its activation, yet *tlr4* expression  
176 did not increase with LPS stimulation following ciprofloxacin treatment (Fig 3D). Clindamycin  
177 treated barriers had lower levels of *tlr4* relative to vehicle, though this was not significantly lower  
178 than for tigecycline by student's t test (Fig 3D). We found *il8* gene expression (Fig. 3E) is reduced  
179 following ciprofloxacin and clindamycin treatment but unchanged with tigecycline in LPS-treated  
180 barriers. IL-8 secretion (Fig. 3F) was reduced to a statistically significance extent in all treatment  
181 groups. It is likely the magnitude of change is important in the case of CDAD-associated  
182 antibiotics.

183 To test whether the immune cells are impaired in function, we performed phagocytosis and  
184 killing assays using GFP+ *E. coli*. We find that pre-treating macrophages with CDAD-associated  
185 antibiotics reduce both phagocytosis of *E. coli* (Fig. 4A) and subsequent killing of phagocytosed  
186 *E. coli* (Fig. 4B). Together, these data confirm loss of immune responsiveness with CDAD-  
187 associated antibiotics, which one can imagine might contribute to outgrowth of *C. difficile*.

188

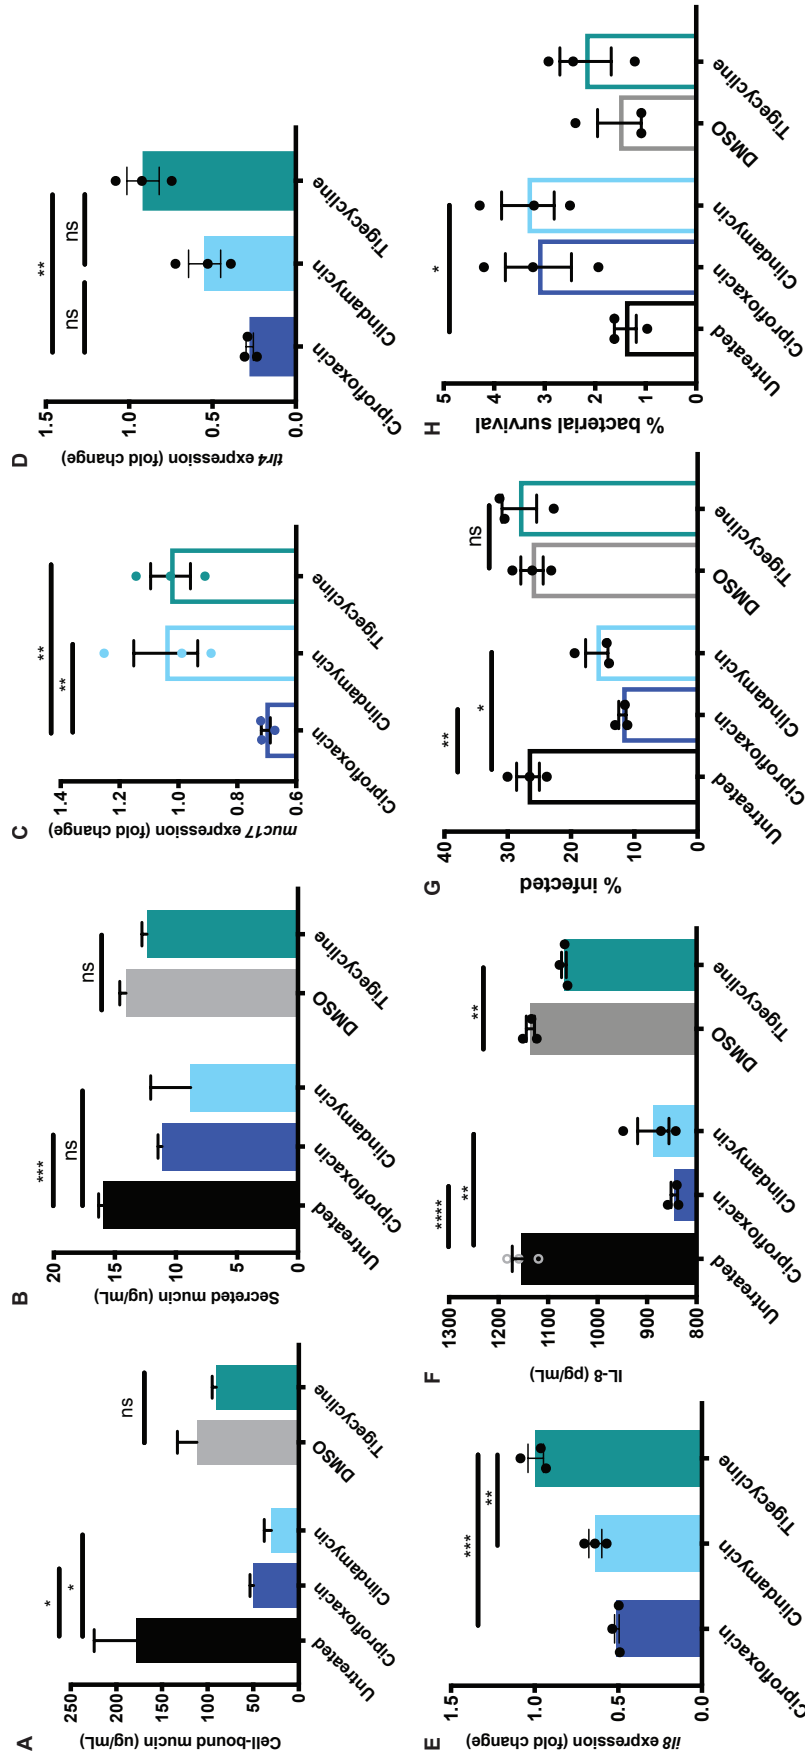

**Fig 3: CDAD-associated antibiotics reduce mucosal barrier and immune functions.** A) Cell-bound and B) secreted mucin quantification. C) Expression fold changes of *muc7* in primary cell-derived 2D enteroids relative to vehicle by qPCR. D-F) Immune-competent monolayers: D) *tir4* and E) *il8* gene expression fold change with LPS stimulation relative to vehicle by qPCR. F) Total IL-8 basal secretion with LPS stimulation by ELISA. Representative data, experiments repeated 2-3 times with similar results, n=3 per experiment. G) Quantification of phagocytosis and H) intracellular killing of *E. coli* by primary macrophages pre-treated for 3 days with indicated antibiotic. Primary cell data in open bars, cell line data in filled bars. Representative data, experiments repeated 2-3 times with similar results, n=3 per experiment. Statistical significance determined by student's t test; \* $<0.05$ , \*\* $<0.01$ , \*\*\* $<0.001$ , \*\*\*\* $<0.0001$ .

190 Antibiotic effects are recapitulated in primary tissue

191 Previous work has shown the importance of mucus—primarily made up of mucins—on  
192 preventing *C. difficile* toxins from entering gut cell lines in culture<sup>30</sup>. CDAD's pathology is driven  
193 by the cytotoxic effects of toxins, primarily TcdB<sup>28</sup>. TcdB enters epithelial cells through receptor-  
194 mediated endocytosis. Following acidification of the vacuole, the toxin enters the cytosol where it  
195 glucosylates its GTPase targets Rho, Rac, and Cdc42. This leads to actin depolymerization,  
196 characterized by visible rounding of the cell, and eventually to cell death. Our robust mucosal  
197 barrier is affected by TcdB as expected, by cell rounding and death as measured by holes in the  
198 monolayer after 48 hours of treatment with *C. difficile* filtered culture supernatant (Supplemental  
199 Fig S5).

200 To understand the translation of these altered barrier properties to potential impact in CDAD,  
201 we treated mucosal barriers with TcdB and measured its action by the loss of a cellular target,  
202 activated Rac-1, by western blot analysis. Both CDAD-associated antibiotics had deactivation of  
203 Rac1 at 24hrs while tigecycline and controls were still active by quantitative western blot (Fig. 4C,  
204 D), implicating a shared sensitization to *C. difficile* toxin from CDAD-associated antibiotics with  
205 a mechanism independent of commensals.

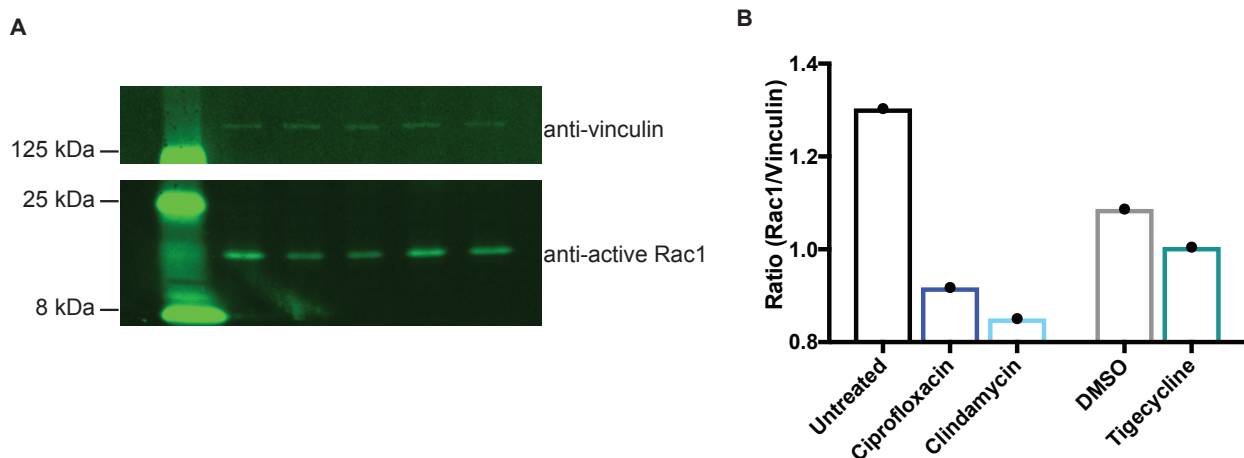

**Fig 4: CDAD-associated antibiotic effect is recapitulated in primary tissue.** A) Western blots show reduced active Rac1 in primary cell-derived monolayers. B) Quantification of western blot, Rac1:vinculin. Repeated twice with similar results, n=1 shown.

## 207 Discussion

208 Here we demonstrate the convergent changes to the host from two separate CDAD-associated  
209 antibiotics in the absence of commensal bacteria. CDAD has been suggested to be a multi-phase  
210 system, where germination, outgrowth, and toxin production each have distinct signals upon which  
211 they activate<sup>31</sup>. Substantial work has shown that antibiotics contribute to CDAD by changing  
212 commensal structure and removing inhibition on both germination and outgrowth<sup>32</sup>. Yet, the  
213 specific structural definition of a CDAD-inhibitory gut microbiome remains elusive.

214 Our data suggest a potential mechanism by which an already outgrown but microbiome-  
215 controlled population of *C. difficile* might be able to take hold and produce toxin following the  
216 host changes of CDAD-associated antibiotics: loss of mucin barrier, increased sensitivity to toxin,  
217 and reduced innate immune response. We found that both CDAD-associated antibiotics lead to  
218 increased toxin transport (Fig. 2D) and concomitant sensitivity to toxin B (Fig. 4C, D).

219 Increased relative abundance of proteobacteria is associated with CDAD and has been proposed  
220 to be a risk factor<sup>33</sup>. Proteobacterial bloom following antibiotic treatment might be accounted for  
221 by the loss of *E. coli* and LPS responsiveness we uncovered.

222 Host-directed therapies might circumvent recurrent or drug resistant infection or prevent CDAD  
223 completely. Host response is a better predictor of patient outcome than specific changes to the  
224 microbiome or even than *C. difficile* bacterial load<sup>34</sup>, suggesting host stratification might be  
225 effective in preventing CDAD. Future work is required to identify potential host-directed therapies  
226 that might increase mucin production or innate immunity in the colon of patients taking high risk  
227 antibiotics. This work suggests using caution when prescribing CDAD-associated antibiotics,  
228 particularly to those at higher risk for CDAD.

229 Our work defines a new role for effects of CDAD-associated antibiotics on CDAD pathology,  
230 namely, the commensal-independent effects on the host. By reducing barrier function and immune

231 cell capability and increasing toxin sensitivity, antibiotics with high risk for CDAD may prime the  
232 host to be less prepared for combating *C. difficile* infection and pathogenesis. This has important  
233 implications for potential host-directed prophylactic or CDAD-treatment therapies. Further work  
234 is needed to understand the commensal-independent effects of other antibiotics that might  
235 similarly prime the gut for enteric infection.

236



## 237 Methods

### 238 Tissue culture: cell lines

239 Caco2 (clone: C2BBE1, passage 48–58, ATCC, Manassas, VA) and HT29-MTX (passage 20–30,  
240 Sigma–Aldrich, St. Louis, MO) were maintained in DMEM (Gibco, Gaithersburg, MD)  
241 supplemented with 10% heat-inactivated FBS (Atlanta Biologicals, Flowery Branch, GA), 1%  
242 GlutaMax (Gibco), 1% Non-Essential Amino Acids (NEAA, Gibco), and 1%  
243 Penicillin/Streptomycin (P/S). Both cell lines were passaged twice post thawing before their use  
244 for transwell seeding. Briefly, the apical side of transwell membrane were coated with 50mg/mL  
245 Collagen Type I (Corning Inc., Corning, NY) overnight at 4°C. Caco2 at 80–90% confluence  
246 and HT29-MTX at 90–95% confluence were harvested using 0.25% Trypsin-EDTA and  
247 mechanically broken up into single cells. 9:1 ratio of C2BBE1 to HT29-MTX was seeded onto  
248 12-well 0.4mm pore polyester transwell inserts (Corning, Tewksbury, MA) at a density of  $10^5$   
249 cells/cm<sup>2</sup>. Seeding media contained 10% heat inactivated FBS, 1x GlutaMax and 1% P/S in  
250 Advanced DMEM (Gibco). Seven days post seeding, the media was switched to a serum-free gut  
251 medium by replacing FBS with Insulin-Transferrin-Sodium Selenite (ITS, Roche, Indianapolis,  
252 IN) and the epithelial cultures were matured for another 2 weeks. P/S was left out of media  
253 during experimental procedures.

### 254 Tissue culture: primary cells

255 Colon organoids (enteroids) used in this study were established and maintained as previously  
256 described<sup>35,36</sup>. Endoscopic tissue biopsies were collected from the ascending colon of de-  
257 identified individuals at either Boston Children’s Hospital or Massachusetts General Hospital  
258 upon the donors informed consent. Methods were carried out in accordance to the Institutional  
259 Review Board of Boston Children’s Hospital (protocol number IRB-P00000529) and the Koch



260 Institute Institutional Review Board Committee as well as the Massachusetts Institute of  
261 Technology Committee on the Use of Humans as Experimental Subjects. Tissue was digested in  
262 2 mg ml<sup>-1</sup> collagenase I (StemCell, cat. no. 07416) for 40 min at 37 °C followed by mechanical  
263 dissociation, and isolated crypts were resuspended in growth factor-reduced Matrigel (Becton  
264 Dickinson, cat. no. 356237) and polymerized at 37 °C. Organoids were grown in expansion  
265 medium (EM) consisting of Advanced DMEM/F12 supplemented with L-WRN conditioned  
266 medium (65% vol/vol, ATCC, cat. no. CRL-3276), 2 mM Glutamax (Thermo Fisher, cat. no.  
267 35050-061), 10 mM HEPES (Thermo Fisher, cat. no. 15630-080), Penicillin/Streptomycin  
268 (Pen/Strep) (Thermo Fisher, cat. no. 15070063), 50 ng ml<sup>-1</sup> murine EGF (Thermo Fisher, cat. no.  
269 PMG8041), N2 supplement (Thermo Fisher, cat. no. 17502-048), B-27 Supplement (Thermo  
270 Fisher, cat. no. 17502-044), 10 nM human [Leu15]-gastrin I (Sigma, cat. no. G9145), 500 μM  
271 N-acetyl cysteine (Sigma, cat. no. A9165-5G), 10 mM nicotinamide (Sigma, cat. no. N0636), 10  
272 μM Y27632 (Peptide, cat. no. 1293823), 500 nM A83-01 (Tocris, cat. no. 2939), 10 μM  
273 SB202190 (Peptide, cat. no. 1523072) 5 nM prostaglandin E2 (StemCell cat. no. 72192) at  
274 37°C and 5% CO<sub>2</sub>. Organoids were passaged every 7 days by incubating in Cell Recovery  
275 Solution (Corning, cat. no. 354253) for 40 min at 4 °C, followed by mechanical dissociation and  
276 reconstitution in fresh Matrigel at a 1:4 ratio.

277 For 2D enteroid studies, at day 7 post passaging, colon organoids were collected, Matrigel  
278 was dissolved with Cell Recovery Solution for 40 min at 4 °C followed by incubation of  
279 Matrigel-free organoids in Trypsin (Sigma, cat. no. T4549) at 37 °C for 5 minutes. Organoids  
280 were mechanically dissociated into single cells, resuspended in EM without nicotinamide and 2.5  
281 μM thiazovivin (Tocris, cat. no. 3845) in the place of Y27632, and seeded onto 24-well 0.4 μm  
282 pore polyester transwell inserts (Corning, 3493) coated with a 200 μg/mL type 1 collagen and  
283 1% Matrigel mixture at a density of 1 x 10<sup>5</sup> cells/transwell. After 3-4 days of incubation,

284 monolayers were confluent and differentiation was initiated. For differentiation apical media was  
285 replaced with Advanced DMEM/F12 plus HEPES, glutamax, and Pen/Strep and basal media  
286 with differentiation medium (DM), which is EM without L-WRN conditioned medium,  
287 nicotinamide, prostaglandin E2 and Y27632, but supplemented with 100 ng ml<sup>-1</sup> human  
288 recombinant noggin (Peprotech, cat. no. 120-10C) and 20% R-spondin conditioned medium  
289 (Sigma, cat. no. SCC111). Transepithelial electrical resistance (TEER) measurements were  
290 performed using the EndOhm-12 chamber with an EVOM2 meter (World Precision  
291 Instruments). At day 8 post seeding, the 2D enteroids were washed to remove P/S and used for  
292 further experimentation.

293 Monocyte-derived dendritic cells were used as the immune component of the gut when  
294 indicated. Briefly, peripheral blood mononuclear cells (PBMCs) were processed from Leukopak  
295 (STEMCELL Technologies, Vancouver, BC, Canada). Monocytes were isolated from PBMCs  
296 using the EasySep Human Monocyte Enrichment Kit (STEMCELL Technologies, 19058) and  
297 were differentiated in RPMI medium (Gibco) supplemented with 10% heat-inactivated FBS  
298 (Gibco), 50 ng/mL GM-CSF (Biolegend, San Diego, CA), 35 ng/mL IL4 (Biolegend), and 10  
299 nM Retinoic acid (Sigma). After 7 days of differentiation (at day 19–20 post epithelial cell  
300 seeding), immature dendritic cells were harvested using PBS (Gibco) and seeded onto the basal  
301 side of the gut transwells in the absence of P/S 1 day prior to start of experiment. Macrophages  
302 were derived similarly, but with M-CSF (Biolegend) at 500 ng/mL.

303

#### 304 RNA preparation, qPCR

305 RNA was prepared using PureLink RNA Mini Kit (Invitrogen, Carlsbad, CA) according to  
306 manufacturer's instructions. DNA removal was done on column with PureLink DNase  
307 (Invitrogen). cDNA synthesis using High-Capacity RNA-to-cDNA Kit (Applied Biosystems,

308 Foster City, CA) according to product insert. qPCR was completed using TaqMan® assays with  
309 Fast Advanced Master Mix (Applied Biosystems) as per manufacturer's guidelines.

310

### 311 3' DGE library preparation

312 RNA samples were quantified and quality assessed using an Advanced Analytical Fragment  
313 Analyzer. 20ng of totalRNA was used for library preparation with ERCC Spike-in control Mix A  
314 (Ambion 10-6 final dilution). All steps were performed on a Tecan EVO150. 3'DGE-custom  
315 primers 3V6NEXT-bmc#1-24 are added to a final concentration of 1.2uM. (5'-  
316 /5Biosg/ACACTCTTCCCTACACGACGCTCTCCGATCT[BC<sub>6</sub>]N<sub>10</sub>T<sub>30</sub>VN-3' where  
317 5Biosg = 5' biotin, [BC<sub>6</sub>] = 6bp barcode specific to each sample/well, N<sub>10</sub> = Unique Molecular  
318 Identifiers, Integrated DNA technologies). After addition of the oligonucleotides, samples were  
319 denatured at 72C for 2 minutes followed by addition of SMARTScribe RT per manufacturer's  
320 recommendations with Template-Switching oligo5V6NEXT (12uM, [5V6NEXT : 5'-  
321 iCiGiCACACTCTTCCCTACACGACGCrGrGrG-3' where iC: iso-dC, iG: iso-dG, rG: RNA  
322 G ]) and incubation at 42C for 90' followed by inactivation at 72C for 10'. Following the  
323 template switching reaction, cDNA from 24 wells containing unique well identifiers were pooled  
324 together and cleaned using RNA Ampure beads at 1.0X. cDNA was eluted with 90 ul of water  
325 followed by digestion with Exonuclease I at 37C for 45 minutes, inactivation at 80C for 20  
326 minutes. Single stranded cDNA was then cleaned using RNA Ampure beads at 1.0X and eluted  
327 in 50ul of water. Second strand synthesis and PCR amplification was done using the Advantage  
328 2 Polymerase Mix (Clontech) and the SINGV6 primer (10 pmol, Integrated DNA Technologies  
329 5'-/5Biosg/ACACTCTTCCCTACACGACGC-3' ). 12 cycles of PCR was performed followed  
330 by clean up using regular SPRI beads at 1.0X, and was eluted with 20ul of EB. Successful  
331 amplification of cDNA was confirmed using the Fragment Analyzer. Illumina libraries are then

332 produced using standard Nextera tagmentation substituting P5NEXTPT5-bmc primer (25 $\mu$ M,  
333 Integrated DNA Technologies, (5'-  
334 AATGATACGGCGACCACCGAGATCTACACTCTTTCCCTACACGACGCTCTTCCG\*A\*T  
335 \*C\*T\*-3' where \* = phosphorothioate bonds. ) in place of the normal N500 primer.  
336 Final libraries were cleaned using SPRI beads at 1X and quantified using the Fragment Analyzer  
337 and qPCR before being loaded for paired-end sequencing using the Illumina NextSeq500.

338

### 339 [Sequencing data analysis](#)

340 Post-sequencing, quality-control on each of the libraries was performed to assess coverage depth,  
341 enrichment for messenger RNA (exon/intron and exon/intergenic density ratios), fraction of  
342 rRNA reads and number of detected genes using bespoke scripts. The sequencing reads were  
343 mapped to hg38 reference using star/2.5.3a. Gene expression counts were further estimated using  
344 ESAT v1<sup>37</sup>.

345

### 346 [Data availability statement](#)

347 The data discussed in this publication have been deposited in NCBI's Gene Expression Omnibus  
348 (Edgar et al., 2002) and are accessible through GEO Series accession number GSE135383  
349 (<https://www.ncbi.nlm.nih.gov/geo/query/acc.cgi?acc=GSE135383>).

350

### 351 [Phagocytosis and Intracellular Killing assays](#)

352 *Escherichia coli* GFP (ATCC<sup>®</sup> 25922GFP<sup>™</sup>) (*E. coli*) was grown to early log in LB media plus  
353 ampicillin, then washed and resuspended in RPMI without antibiotic at the appropriate density.  
354 PBMC-derived macrophages were treated with low dose (Supplemental Table 1) of indicated

355 antibiotic for 3 days in RPMI with heat-inactivated FBS (Atlanta Biologicals). Antibiotic was  
356 removed and antibiotic-free RPMI with GFP+ *E. coli* was added at an MOI of 10:1. Extracellular  
357 *E. coli* were washed off at indicated time. For phagocytosis, at 30 minutes post infection, cells  
358 were fixed and permeabilized, DAPI (4',6-diamidino-2-phenylindole, Thermo Fisher) and  
359 ActinRed™ 555 ReadyProbes™ (Molecular Probes, Life Technologies, Carlsbad, CA) stained,  
360 and imaged. Percent macrophages with at least one GFP+ bacterium was calculated from  
361 fluorescent microscopy images. For intracellular survival assay, macrophages were lysed in  
362 water, and supernatants were plated for CFU.

363

#### 364 Self-organizing map

365 Gene expression fold changes from controls across antibiotics were considered as a function of  
366 CDAD risk and were normalized to be between 0 and 1 across the 3 antibiotics used. Genes  
367 without expression fold changes across all 3 conditions were omitted. The map was initialized  
368 with a 2-dimensional 3×3 square grid and implemented using the MATLAB (MathWorks,  
369 Natick, MA) R2017b Neural Network Toolbox.

370

#### 371 Gene Ontology Enrichment Analysis

372 Gene ontology enrichment on all GO terms was performed using the free online PANTHER  
373 overrepresentation test<sup>38-40</sup>. FDR was set to <0.05.

374

## 375 Data Representation and Statistical Analysis

376 Prism 8 software (GraphPad Software, La Jolla, CA) was used to graph all data except SOMs.

377 Statistical tests of measurements were used from the Prism suite as noted in figure legends.

378 Statistical significance is indicated by as follows: \* $<0.05$ , \*\* $<0.01$ , \*\*\* $<0.001$ , \*\*\*\* $<0.0001$ .

379

## 380 Viability/Cytotoxicity analysis

381 Viability of monolayers post-antibiotic treatment was assessed using the Viability/Cytotoxicity

382 Assay for Animal Live & Dead Cells kit (Biotium, Fremont, CA) according to package insert.

383 Ratio of red to green cells was measured using ImageJ.

384

## 385 Soluble mucin quantification by Alcian blue colorimetric assay

386 Apical medium was stained for 2 h at room temperature with 1% Alcian blue (Electron

387 Microscopy Sciences) at a ratio of 1:4 with the sample. Dye-treated mucin was sedimented by a

388 30-min centrifugation (), followed by two wash steps in wash buffer (290 mL 70% ethanol, 210

389 mL 0.1 M acetic acid, and 1.2 g  $MgCl_2$ ). Dye-treated mucin was resuspended in 10% SDS and

390 absorbance was read on a plate reader at 620 nm. Calculations were made based on a known

391 standard prepared in parallel.

392

## 393 Western blotting

394 Western blotting was performed under reducing conditions using iBlot 2 dry blotting system

395 (Invitrogen) standard procedures. Primary antibodies were incubated at 4°C overnight diluted as

396 noted in Odyssey blocking buffer: rabbit monoclonal anti-Vinculin antibody (abcam, Cambridge,

397 MA [EPR8185]) at 1:3000, mouse monoclonal anti-Rac1 antibody (abcam, [23A8]) at 1:750,

398 and purified mouse Anti-Rac1 antibody (BD Transduction Laboratories, San Jose, CA [clone  
399 102/Rac1]) at 1:750. For detection, LI-COR (Lincoln, NE) goat anti-rabbit or anti-mouse IR800-  
400 conjugated secondaries at 1:8,000 were incubated for 30 minutes at room temperature in  
401 Odyssey blocking buffer (TBS) with 0.1% Tween 20. Imaging of membrane using LI-COR  
402 Odyssey imager with settings as follows: 24  $\mu$ m resolution and high quality, laser intensity of 2.0  
403 on the 800 channel.

404

#### 405 Chemokine quantification

406 Secreted IL-8 was measured by Quantikine® ELISA Human IL-8/CXCL8Immunoassay (R&D  
407 Systems, Minneapolis, MN) per manufacturer's guidelines.

#### 408 Acknowledgements

409 JCK supported by an administrative supplement to NIH R01-EB021908. DKB supported by  
410 Research Beyond Borders Program of Boehringer Ingelheim Pharmaceuticals. This work was  
411 supported in part by the Koch Institute Support (core) Grant P30-CA14501 from the National  
412 Cancer Institute and NIEHS Grant P30-ES002109. We thank the members of the LGG and DAL  
413 labs for their scientific input.

#### 414 Author Contributions Statement

415 JCK and LGG conceived of the project. JCK designed the experiments. JCK acquired and  
416 analyzed the data, with technical support from JV and CW. JCK and DKB performed self-  
417 organizing maps analysis, with critical validation from DAL. JCK drafted the original  
418 manuscript. All authors contributed to manuscript revisions. LGG and DAL provided oversight  
419 and leadership for the project. LGG provided grant support for all study materials and reagents.

420

421 [Competing interests](#)

422 The authors declare no competing interests.

423



## 424 References

- 425 1. CDC. *2015 Annual Report for the Emerging Infections Program for Clostridium difficile*  
426 *Infection*. (2017). doi:10.3945/ajcn.116.139097
- 427 2. Lessa, F. C. *et al.* Burden of Clostridium difficile Infection in the United States. *N Engl J*  
428 *Med* **372**, 825–834 (2015).
- 429 3. Desai, K. *et al.* Epidemiological and economic burden of Clostridium difficile in the  
430 United States: estimates from a modeling approach. *BMC Infect Dis* 1–10 (2016).  
431 doi:10.1186/s12879-016-1610-3
- 432 4. Lewis, B. B. & Pamer, E. G. Microbiota-Based Therapies for Clostridium difficile and  
433 Antibiotic-Resistant Enteric Infections. *Annu. Rev. Microbiol.* **71**, 157–178 (2017).
- 434 5. DePestel, D. D. & Aronoff, D. M. Epidemiology of Clostridium difficile infection. *J*  
435 *Pharm Pract* **26**, 464–475 (2013).
- 436 6. Kaufmann, S. H. E., Dorhoi, A., Hotchkiss, R. S. & Bartenschlager, R. Host-directed  
437 therapies for bacterial and viral infections. *Nature Publishing Group* **17**, 35–56 (2017).
- 438 7. Buffie, C. G. & Pamer, E. G. Microbiota-mediated colonization resistance against  
439 intestinal pathogens. *Nature Reviews Immunology* **13**, 790–801 (2013).
- 440 8. Darkoh, C., DuPont, H. L., Norris, S. J. & Kaplan, H. B. Toxin Synthesis by Clostridium  
441 difficile Is Regulated through Quorum Signaling. *mBio* **6**, S88–10 (2015).
- 442 9. Lyras, D. *et al.* Toxin B is essential for virulence of Clostridium difficile. *Nature* **458**,  
443 1176–1179 (2009).
- 444 10. McFarland, L. V. Epidemiology, risk factors and treatments for antibiotic-associated  
445 diarrhea. *Dig Dis* **16**, 292–307 (1998).
- 446 11. Theriot, C. M. & Young, V. B. Interactions Between the Gastrointestinal Microbiome and  
447 Clostridium difficile. *Annu. Rev. Microbiol.* **69**, 445–461 (2015).
- 448 12. Khanna, S. & Gupta, A. Community-acquired Clostridium difficile infection: an  
449 increasing public health threat. *IDR* 63–10 (2014). doi:10.2147/IDR.S46780
- 450 13. Dial, S., Delaney, J. A. C., Barkun, A. N. & Suissa, S. Use of gastric acid-suppressive  
451 agents and the risk of community-acquired Clostridium difficile-associated disease. *JAMA*  
452 **294**, 2989–2995 (2005).
- 453 14. Milani, C. *et al.* Gut microbiota composition and Clostridium difficile infection in  
454 hospitalized elderly individuals: a metagenomic study. *Sci. Rep.* 1–12 (2016).  
455 doi:10.1038/srep25945
- 456 15. Shin, N.-R., Whon, T. W. & Bae, J.-W. Proteobacteria: microbial signature of dysbiosis in  
457 gut microbiota. *Trends in Biotechnology* **33**, 496–503 (2015).
- 458 16. Vermeire, S. *et al.* Donor Species Richness Determines Faecal Microbiota Transplantation  
459 Success in Inflammatory Bowel Disease. *ECCOJC* **10**, 387–394 (2016).
- 460 17. Song, Y. *et al.* Microbiota Dynamics in Patients Treated with Fecal Microbiota  
461 Transplantation for Recurrent Clostridium difficile Infection. *PLoS ONE* **8**, e81330–11  
462 (2013).
- 463 18. Contijoch, E. J. *et al.* Gut microbiota density influences host physiology and is shaped by  
464 host and microbial factors. *Elife* **8**, 337–26 (2019).
- 465 19. Maier, L. *et al.* Extensive impact of non-antibiotic drugs on human gut bacteria. *Nature* 1–  
466 26 (2018). doi:10.1038/nature25979
- 467 20. Morgun, A. *et al.* Uncovering effects of antibiotics on the host and microbiota using  
468 transkingdom gene networks. *Gut* **64**, 1732–1743 (2015).

- 469 21. Tsamandouras, N. *et al.* Integrated Gut and Liver Microphysiological Systems for  
470 Quantitative In Vitro Pharmacokinetic Studies. *AAPS J* **19**, 1499–1512 (2017).
- 471 22. Chen, W. L. K. *et al.* Integrated gut/liver microphysiological systems elucidates  
472 inflammatory inter-tissue crosstalk. *Biotechnol. Bioeng.* **7**, 383–12 (2017).
- 473 23. Haran, J. P. *et al.* Factors influencing the development of antibiotic associated diarrhea in  
474 ED patients discharged home: risk of administering IV antibiotics. *The American Journal*  
475 *of Emergency Medicine* **32**, 1195–1199 (2014).
- 476 24. Deshpande, A. *et al.* Community-associated *Clostridium difficile* infection and antibiotics:  
477 a meta-analysis. *J. Antimicrob. Chemother.* **68**, 1951–1961 (2013).
- 478 25. Brown, K. A., Khanafar, N., Daneman, N. & Fisman, D. N. Meta-Analysis of Antibiotics  
479 and the Risk of Community-Associated *Clostridium difficile* Infection. *Antimicrobial*  
480 *Agents and Chemotherapy* **57**, 2326–2332 (2013).
- 481 26. Herold, C. *et al.* Ciprofloxacin induces apoptosis and inhibits proliferation of human  
482 colorectal carcinoma cells. *Br. J. Cancer* **86**, 443–448 (2002).
- 483 27. van Putten, J. P. M. & Strijbis, K. Transmembrane Mucins: Signaling Receptors at the  
484 Intersection of Inflammation and Cancer. *J Innate Immun* **9**, 281–299 (2017).
- 485 28. Abt, M. C., McKenney, P. T. & Pamer, E. G. *Clostridium difficile* colitis: pathogenesis  
486 and host defence. *Nature Reviews Microbiology* **14**, 609–620 (2016).
- 487 29. Jose, S. & Madan, R. Neutrophil-mediated inflammation in the pathogenesis of  
488 *Clostridium difficile* infections. *Anaerobe* **41**, 85–90 (2016).
- 489 30. Olson, A., Diebel, L. N. & Liberati, D. M. Effect of host defenses on *Clostridium difficile*  
490 toxin–induced intestinal barrier injury. *Journal of Trauma and Acute Care Surgery* **74**,  
491 983–990 (2013).
- 492 31. Hryckowian, A. J., Pruss, K. M. & Sonnenburg, J. L. The emerging metabolic view of  
493 *Clostridium difficile* pathogenesis. *Current Opinion in Microbiology* **35**, 42–47 (2017).
- 494 32. Abt, M. C. & Pamer, E. G. Commensal bacteria mediated defenses against pathogens.  
495 *Current Opinion in Immunology* **29**, 16–22 (2014).
- 496 33. Seekatz, A. M. & Young, V. B. *Clostridium difficile* and the microbiota. *J. Clin. Invest.*  
497 **124**, 4182–4189 (2014).
- 498 34. Feghaly, El, R. E. *et al.* Markers of Intestinal Inflammation, Not Bacterial Burden,  
499 Correlate With Clinical Outcomes in *Clostridium difficile* Infection. *Clin. Infect. Dis.* **56**,  
500 1713–1721 (2013).
- 501 35. Kasendra, M. *et al.* Development of a primary human Small Intestine-on-a-Chip using  
502 biopsy-derived organoids. *Sci. Rep.* 1–14 (2018). doi:10.1038/s41598-018-21201-7
- 503 36. Roper, J. *et al.* In vivo genome editing and organoid transplantation models of colorectal  
504 cancer and metastasis. *Nature Biotechnology* **35**, 569–576 (2017).
- 505 37. Soumillon, M., Cacchiarelli, D., Semrau, S., van Oudenaarden, A. & Mikkelsen, T. S.  
506 Characterization of directed differentiation by high-throughput single-cell RNA-Seq.  
507 *bioRxiv* doi:10.1101/003236
- 508 38. Mi, H. *et al.* PANTHER version 11: expanded annotation data from Gene Ontology and  
509 Reactome pathways, and data analysis tool enhancements. *Nucleic Acids Research* **45**,  
510 D183–D189 (2017).
- 511 39. The Gene Ontology Consortium. Expansion of the Gene Ontology knowledgebase and  
512 resources. *Nucleic Acids Research* **45**, D331–D338 (2017).
- 513 40. Ashburner, M. *et al.* Gene ontology: tool for the unification of biology. The Gene  
514 Ontology Consortium. *Nat Genet* **25**, 25–29 (2000).
- 515
